# Supplementary material
Source: publisher figshare collection journal article supplement (https://brill.figshare.com/ndownloader/files/21034935)
Supplement: Supplementary file 1 [file 21034935]

# **How Much of What We Learn in Virtual Reality Transfers to Real-World Navigation?**

**Lukas Hejtmanek**<sup>1,2</sup>, **Michael Starrett**<sup>2,3,4</sup>, **Emilio Ferrer**<sup>3</sup> and **Arne D. Ekstrom**<sup>2,3,4,\*</sup>

<sup>1</sup> Third Faculty of Medicine, Charles University, Ruská 87, Prague 10, 100 00, Czech Republic

<sup>2</sup> Center for Neuroscience, University of California, Davis, 1 Shields Ave, Davis, CA 95618, USA

<sup>3</sup> Department of Psychology, University of California, Davis, 1 Shields Ave, Davis, CA 95618, USA

<sup>4</sup> Department of Psychology, University of Arizona, 1503 E. University Blvd.,

Tucson, AZ 85719, USA

Received 15 February 2019; accepted 18 December 2019

\* To whom correspondence should be addressed. E-mail: adekstrom@email.arizona.edu

## **Supplementary Material**

**Table S1.**

General linear model for normalized distance and visitation errors estimates.

| Effect                        | Estimate | Error   | DF   | <i>t</i> value | <i>p</i> value |
|-------------------------------|----------|---------|------|----------------|----------------|
| Intercept (visitation errors) | 11.3781  | 0.4652  | 101  | 24.46          | <0.0001        |
| Intercept (normalized path)   | 0.7563   | 0.07077 | 101  | 10.69          | <0.0001        |
| Slope (visitation errors)     | −2.1701  | 0.09433 | 3565 | −23.01         | <0.0001        |
| Slope (normalized path)       | −0.2003  | 0.01614 | 3069 | −12.41         | <0.0001        |
